# Supplementary material
Source: PubMed Central journal article supplement (PMC4157761)
Supplement: bm500969d_si_001.pdf [file bm500969d_si_001.pdf]

## Supporting Information

# Hybrid Elastin-like Polypeptide-Polyethylene Glycol (ELP-PEG) Hydrogels with Improved Transparency and Independent Control of Matrix Mechanics and Cell Ligand Density

Huiyuan Wang, Lei Cai, Alexandra Paul, Annika Enejder, Sarah C. Heilshorn \*

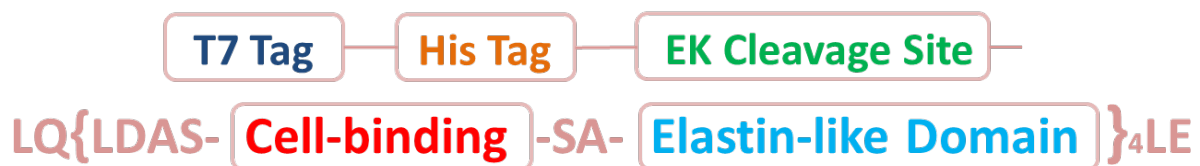

| Module name         | Amino acid sequence                                               |
|---------------------|-------------------------------------------------------------------|
| T7 Tag              | MASMTGGQQMG                                                       |
| His Tag             | HHHHH                                                             |
| EK Cleavage Site    | DDDDK                                                             |
| Adhesive-RGD        | TVYAVTGRGDSPASSAA                                                 |
| Non-adhesive-RDG    | TVYAVTGRDGSPASSAA                                                 |
| Elastin-like Domain | [(VPGIG) <sub>2</sub> VPGKG(VPGIG) <sub>2</sub> ] <sub>3</sub> VP |

**Figure S1.** Amino acid sequences of RGD-ELP and RDG-ELP.

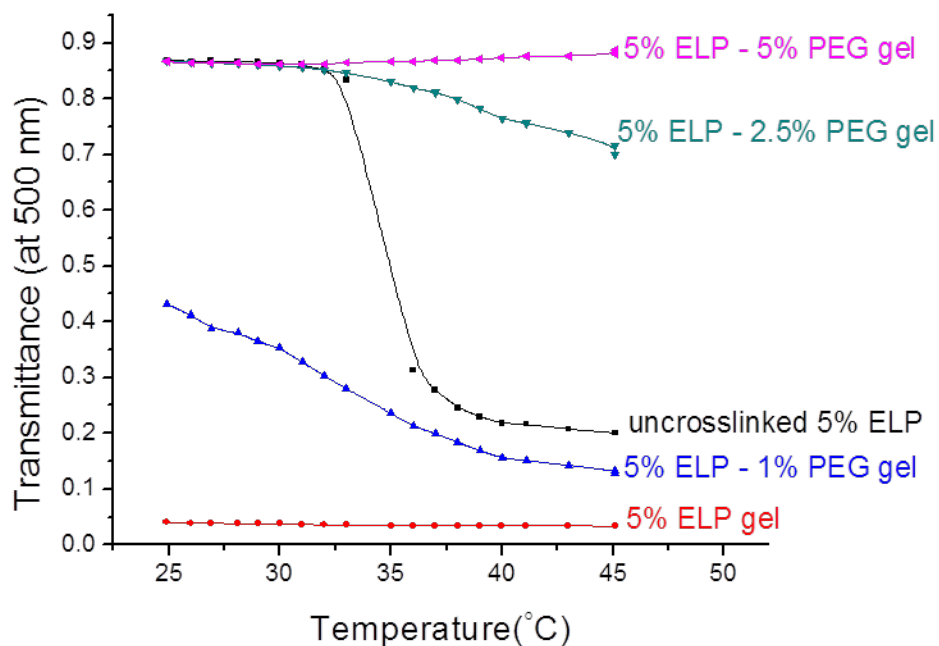

**Figure S2.** Transmittance ( $\lambda = 500 \text{ nm}$ ) versus temperature for different formulations: uncrosslinked 5 wt% ELP solution in PBS (1X, pH 7.4), or ELP-PEG hydrogels with the same ELP (5 wt%) and THP (1.61 mg/mL) concentrations but different PEG concentrations (0 wt%, 1 wt%, 2.5 wt%, and 5wt%). For gel preparation, 50  $\mu\text{L}$  gel solution was pipetted into a 96 well-plate and left at room temperature overnight to ensure complete gelation. The temperature was increased from 25 to 45  $^{\circ}\text{C}$  in 1  $^{\circ}\text{C}$  increments, with a 1-min equilibration time, and absorbance at 500 nm was recorded. The transition temperature,  $T_t$ , was defined as the temperature where the first derivative reached a maximum absolute value on the transmittance versus temperature graph. Uncrosslinked ELP had a  $T_t$  of 33.9  $^{\circ}\text{C}$ . As PEG concentration increased, the hybrid ELP-PEG hydrogels displayed increasing  $T_t$  and higher light transmittance at physiological temperature.

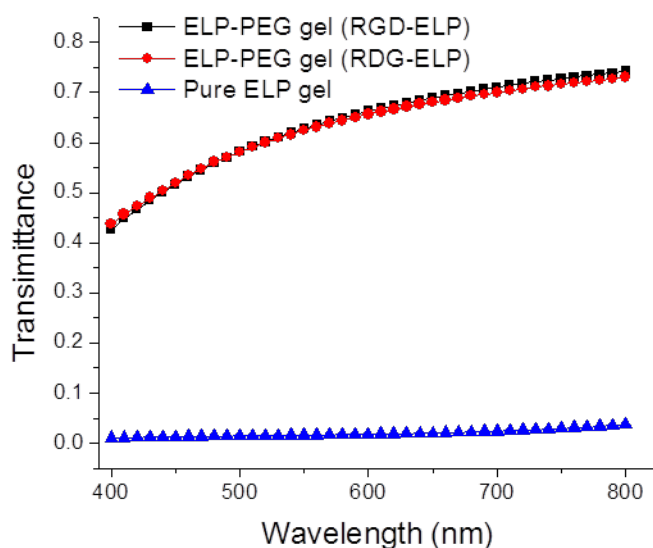

**Figure S3.** Transmittance spectra of pure ELP (5 wt% RGD-ELP plus 2.5 wt% RDG-ELP, X=2.20) and ELP-PEG hydrogels (5 wt% RGD-ELP or RDG-ELP, 2.5 wt% PEG, X=2.20). Briefly, a hydrogel solution (15  $\mu$ L) was pipetted into 384 well-plates, resulting in a thickness of  $\sim$  2000  $\mu$ m. All hydrogel samples were allowed to crosslink for 15 min at room temperature and 10 min at 37  $^{\circ}$ C prior to evaluation. The microplate reader was pre-heated to 37  $^{\circ}$ C, and absorbance values of the samples were measured from 400 to 800 nm with a step-size of 10 nm. The absorbance values were converted to transmittance through the Beer-Lambert Law. Three replicates were tested for each type of hydrogel.

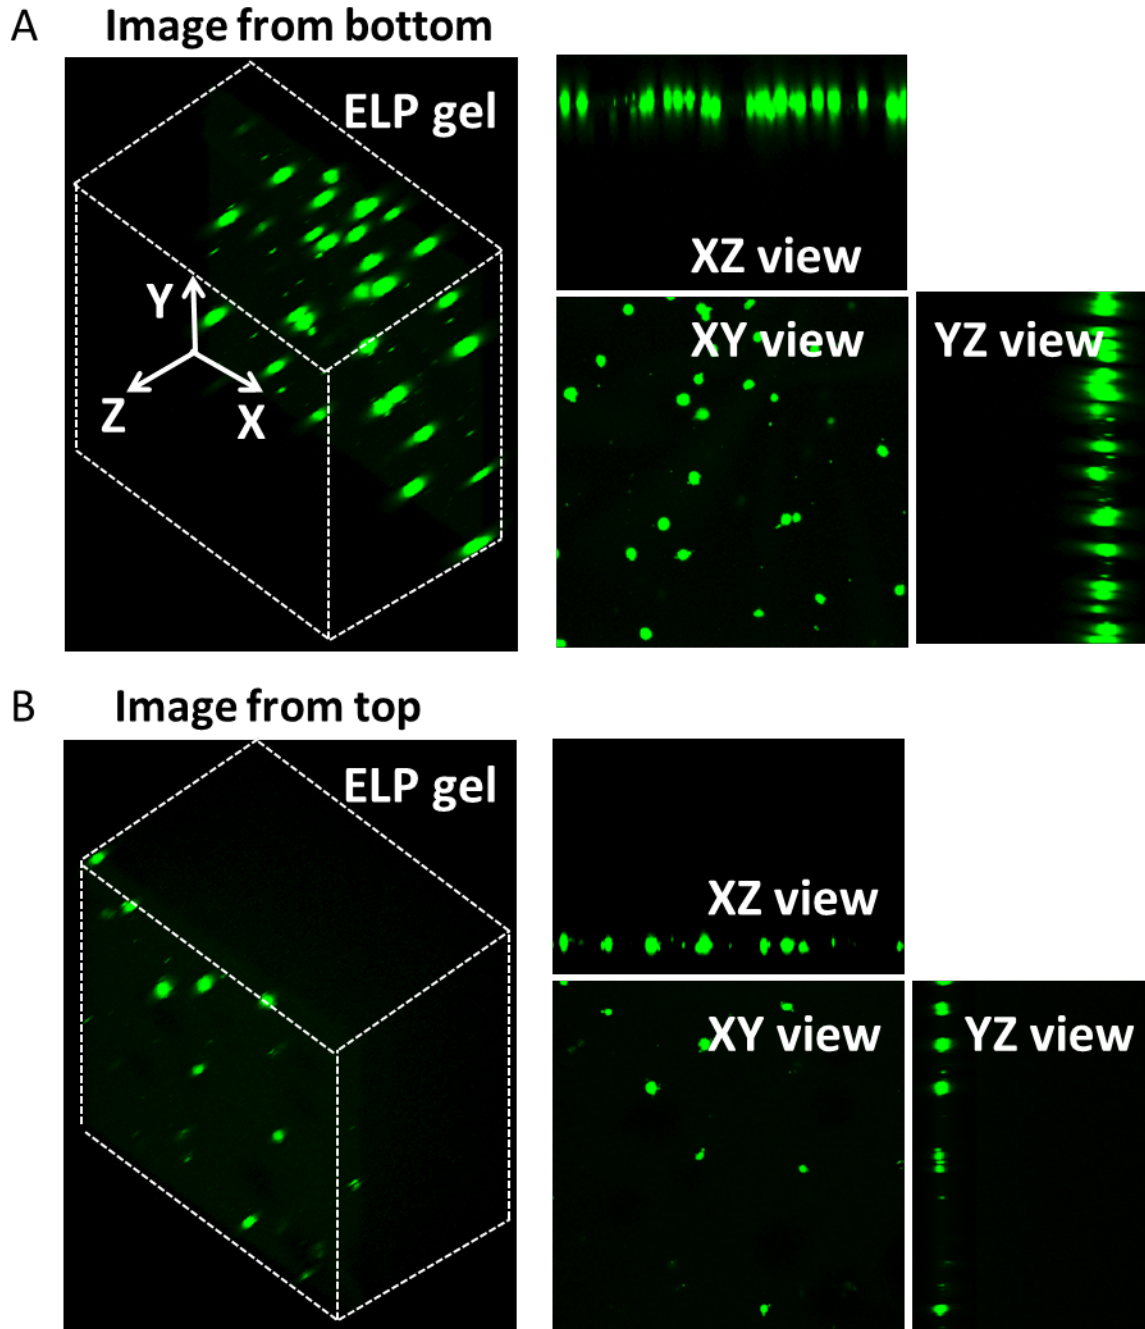

**Figure S4.** Observation of encapsulated human fibroblasts from bottom (A) and top (B) surfaces of a 5 wt% ELP hydrogel with crosslinking ratio,  $X$ , of 2.20. Cells were stained by calcein AM, showing that they were dispersed throughout the gel, but their observation was limited by the low light transmittance of the hydrogel.

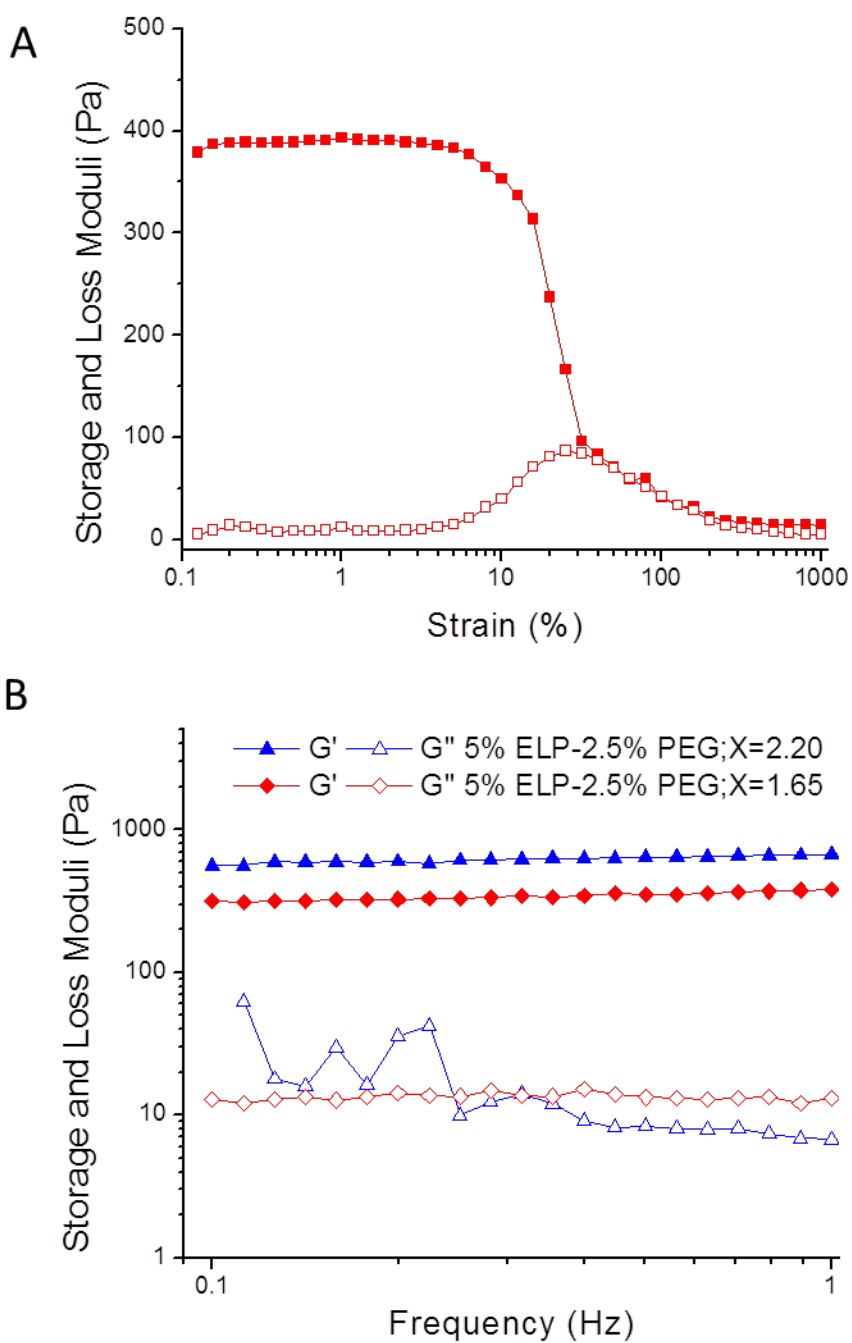

**Figure S5.** Strain sweep and angular frequency sweep rheology. (A) Strain sweep of ELP-PEG hydrogels (5 wt% RGD-ELP, 2.5 wt% PEG, X=1.65). (B) Angular frequency sweeps of ELP-PEG hydrogels (5 wt% RGD-ELP, 2.5 wt% PEG, X=1.65 and 2.20).

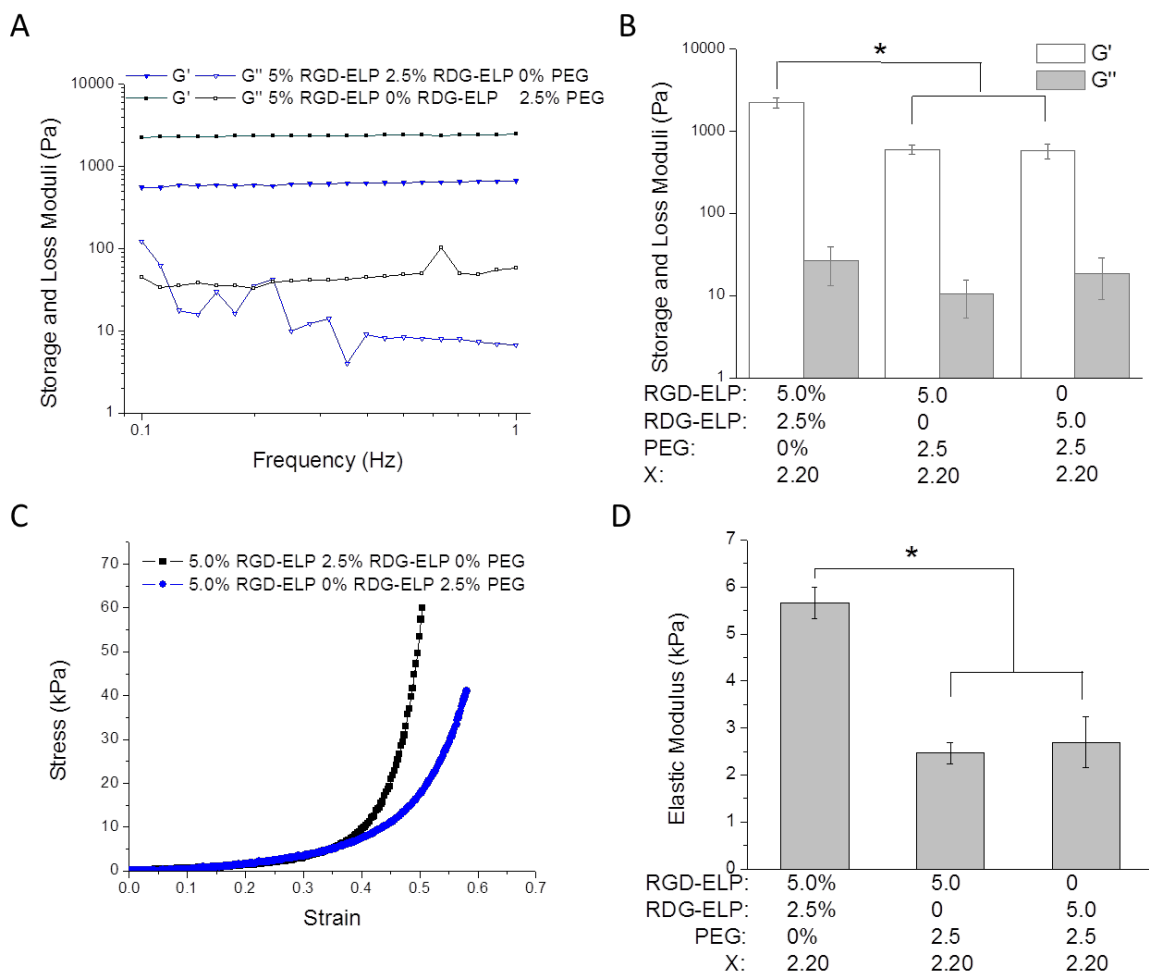

**Figure S6.** Rheological comparison between pure ELP and hybrid ELP-PEG hydrogels fabricated from RGD-ELP or RDG-ELP. Overall polymer concentration (including ELP and PEG) was kept constant at 7.5 wt%, and crosslinking ratio, X, was kept constant at 2.20. (A) Angular frequency sweep. (B) Storage and loss moduli at 1 Hz. (C) Stress-strain curve obtained from unconfined, uniaxial compression tests. (D) Quantification of elastic moduli derived from stress-strain curves.

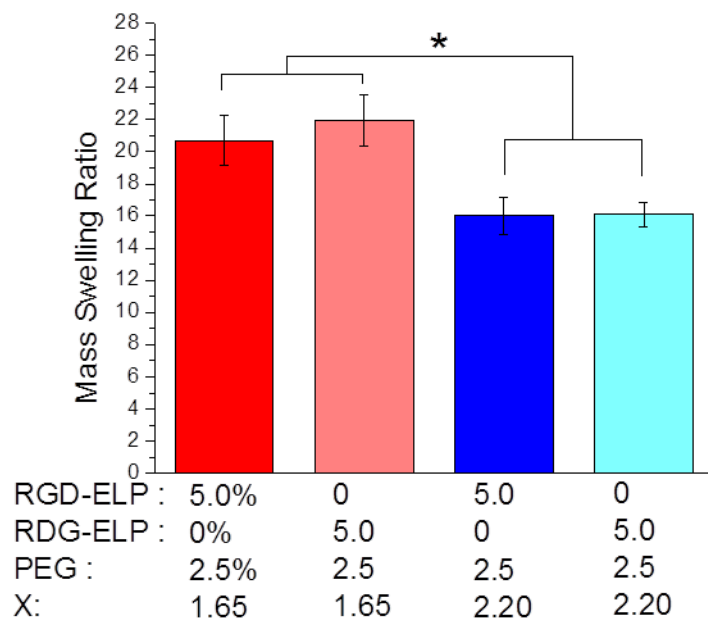

**Figure S7.** Mass swelling ratio of ELP-PEG hydrogels (5 wt% RGD-ELP or RDG-ELP, 2.5 wt% PEG, X=1.65 and 2.20).
